# Supplementary material
Source: PubMed Central journal article supplement (PMC3305847)
Supplement: NIHMS338851-supplement-1.pdf [file NIHMS338851-supplement-1.pdf]

# **Distribution and Expression of Non-Neuronal Transient Receptor Potential (TRPV) Ion Channels in Rosacea**

Mathias Sulk, Stephan Seeliger, Jerome Aubert, Verena D. Schwab, Ferda Cevikbas,  
Michel Rivier, Pawel Nowak, Johannes J. Voegel, Jörg Buddenkotte,  
and Martin Steinhoff

## **Supplementary Information**

**Supplementary Figure S1**

**Supplementary Tables S1-S3**

### Supplementary Figure 1 (Figure S1)

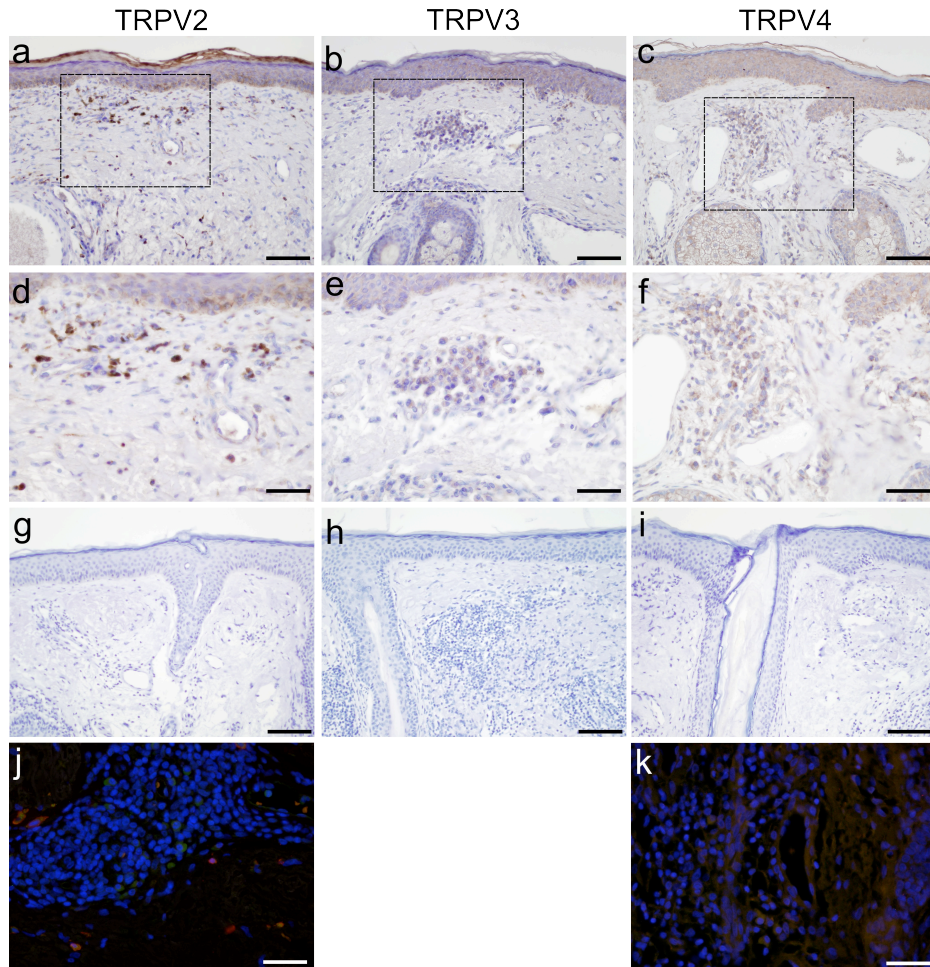

**Figure S1: Demonstration of antibody specificity for TRPV2, TRPV3, and TRPV4.**

We determined the specificity on the protein level by using another different primary antibody against TRPV2 (a, d), TRPV3 (b, e), TRPV4 (c, f), which all showed a similar staining pattern in PhR as compared to Figures 1-3. As negative controls, primary antibodies were omitted and immunostaining was absent for rabbit-TRPV2 in ETR (g), sheep-TRPV3 in LE (h) and rabbit-TRPV4 in ETR (i). Pre-immune absorption control for double-immunofluorescence shows absence of TRPV2 (j) and TRPV4 (k) in PPR demonstrating specificity of immunostaining. Scale bars: 100 $\mu$ m (a-c, g-i), 50 $\mu$ m (d-f), 40 $\mu$ m (j-k).

**Supplementary Table 1: Summary of TRPV-staining in rosacea-affected skin compared to normal skin**

E = semiquantitative analysis of epidermal staining intensity; D = semiquantitative analysis of immunoreactivity in the dermal compartment; qRT-PCR = gene expression.

(+ = upregulation,  $P < 0.4$ ; ++ =  $P < 0.2$ , +++ =  $P < 0.05$ ; - = downregulation,  $P < 0.4$ ; -- =  $P < 0.2$ ; --- =  $P < 0.05$ , n.i. = not investigated/performed, N = normal/no changes)

|              | LE   |      | ETR  |      |         | PPR  |      |         | PhR  |      |         |
|--------------|------|------|------|------|---------|------|------|---------|------|------|---------|
|              | E    | D    | E    | D    | qRT-PCR | E    | D    | qRT-PCR | E    | D    | qRT-PCR |
| <b>TRPV1</b> | n.i. | n.i. | n.i. | n.i. | +++     | n.i. | n.i. | ++      | n.i. | n.i. | +++     |
| <b>TRPV2</b> | N    | +    | N    | +++  | +       | -    | +++  | +++     | ---  | +    | ++      |
| <b>TRPV3</b> | N    | +    | N    | +++  | ++      | -    | ++   | ++      | -    | +++  | +++     |
| <b>TRPV4</b> | N    | N    | N    | +    | N       | N    | +++  | N       | +    | +++  | -       |

## Supplementary Table 2:

## Antibodies used for (double-) immunohistochemistry

| Antibody                    | Host    | Dilution | Source                                                                          |
|-----------------------------|---------|----------|---------------------------------------------------------------------------------|
| TRPV2 (Figure 1)            | rabbit  | 1:300    | AP07065PU-N; Acris Antibodies, Herford, Germany                                 |
| TRPV2 (Figure S1)           | rabbit  | 1:200    | PAB14319; Abnova, Heidelberg, Germany                                           |
| TRPV3 (Figure 2)            | sheep   | 1:1000   | GT15180; Neuromics Antibodies, Edina, MN                                        |
| TRPV3 (Figure S1)           | rabbit  | 1:100    | AP11388PU-N; Acris Antibodies                                                   |
| TRPV4 (Figure 3)            | rabbit  | 1:4000   | ab63003; Abcam, Cambridge, UK                                                   |
| TRPV4 (Figure S1)           | rabbit  | 1:1200   | NB110-55614; Novus Biologicals, Cambridge, UK                                   |
| CD4                         | mouse   | 1:20     | anti-human CD4 IgG1; Biozol, BZL 02416, Eching, Germany                         |
| CD68                        | mouse   | 1:20     | anti-human CD68; DAKO M0876, DAKO, Hamburg, Germany                             |
| Mast Cell Tryptase          | mouse   | 1:100    | Monoclonal Mouse Anti-human Mast Cell Tryptase; DAKO M7052                      |
| Secondary Anti Rabbit (IHC) | goat    | 1:100    | EnVision+ System- HRP Labelled Polymer; DAKO                                    |
| Secondary Anti Sheep (IHC)  | donkey  | 1:100    | EnVision+ System- HRP Labelled Polymer; DAKO                                    |
| Secondary Anti Rabbit (DIF) | chicken | 1:200    | Alexa Fluor 488 chicken anti-rabbit IgG; Molecular Probes, Inc., Eugene, Oregon |
| Secondary Anti Mouse (DIF)  | donkey  | 1:200    | Alexa Fluor 555 donkey anti-mouse IgG; Molecular Probes, Inc.                   |

**Supplementary Table 3:****Ready-to-use Taqman® Gene Expression Assay-Numbers**

| <b>Ready-to-use TaqMan®<br/>Gene Expression Assay</b> | <b>No.</b>    |
|-------------------------------------------------------|---------------|
| <b>TRPV1</b>                                          | Hs00218912_m1 |
| <b>TRPV2</b>                                          | Hs00275032_m1 |
| <b>TRPV3</b>                                          | Hs00376854_m1 |
| <b>TRPV4</b>                                          | Hs00222101_m1 |
| <b>GAPDH</b>                                          | Hs99999905_m1 |
| <b>ACTB</b>                                           | Hs99999903_m1 |
| <b>HPRT</b>                                           | Hs99999909_m1 |
